# Supplementary material
Source: Springer Nature journal article supplement (https://www.springermedizin.de/resource/supplementary/13049_2013_633_MOESM3_ESM.pdf/9666898)
Supplement: MOESM3 [file 9666898]

# Paramedics

## Module 1

Background of the project  
Workflow during teleconsultation  
Legal aspects – legal opinions

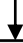

## Module 2

Hands-on Workshop:  
Training with technical equipment  
of the ambulance

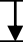

## Module 3

Methods of consultation  
Fundamentals of communication  
Communication problems  
Communication during consultation  
SOP: Delegation of medications

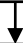

## Module 4

Medical aspects of teleconsultation  
ABCDE-scheme  
SAMPLE-scheme  
Medical SOPs  
Discussion of sample cases  
Workflow during teleconsultation

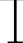

## Module 5

Practical training of tele-  
consultation during simulated  
emergencies (instructor present)

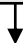

## Module 6

Discussion

# Tele-EMS physicians

## Module 1

Background of the project  
Workflow during teleconsultation  
Legal aspects – legal opinions

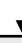

## Module 2

Hands-on Workshop:  
Training with technical equipment  
of the ambulance

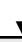

## Module 3

Technical Support  
Training with workstation in  
teleconsultation centre – Part I

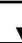

## Module 4

Training with workstation in  
teleconsultation centre – Part II

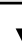

## Module 5

Communication during consultation  
Communication problems  
Standard operating procedures

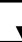

## Module 6

Practical training during  
consultation of simulated  
emergencies (instructor present)

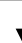

## Module 7

Discussion
